# Supplementary material for: Characterization of 58 STRs and 94 SNPs with the ForenSeq™ DNA Signature Prep Kit in Mexican-Mestizos from the Monterrey City (Northeast, Mexico)
Source: Research Square preprint supplement (doi:10.21203/rs.3.rs-996532/v1), 2021-11-08
Supplement: Supplementary file 1 [file 77781904a6746ad2b81e1b1d.xlsx]

## Sheet: SM4. Forensic param LB aSTR
Supplementary Material SM4. Forensic parameters and allele frequencies lenght based observed in the 27 aSTR loci analyzed with the DNA Signature Prep kit in 105 Mexican mestizos from the city of Monterrey (Northeast, Mexico).
	CSF1PO	D10S1248	D12S391	D13S317	D16S539	D17S1301	D18S51	D19S433	D1S1656	D20S482	D21S11	D22S1045	D2S1338	D21S11	D3S1358	D4S2408	D5S818	D6S1043	D7S820	D8S1179	D9S1122	FGA	PentaD	PentaE	TH01	TPOX	vWA
2.2																							0.0095
5																							0.0048	0.0389
6																			0.0048						0.3429	0.0048
7	0.0048			0.0048													0.0905		0.1048					0.0778	0.3333
8	0.0095			0.0951	0.0095											0.1381	0.0048						0.0143	0.0333	0.0571	0.5
9	0.0095			0.2238	0.1238					0.0048						0.5714	0.0476		0.0714		0.0095		0.2286	0.0111	0.1143	0.0476
9.2																			0.2381
9.3																									0.1524
10	0.2524	0.0048		0.1286	0.1905	0.0238	0.0048	0.0049						0.4048		0.1429	0.0429	0.0095		0.1143	0.0286		0.2286	0.0333		0.0714
11	0.3048	0.0048		0.2048	0.3	0.3238		0.0146	0.0095	0.0143		0.1		0.2762		0.1333	0.4476	0.1238	0.319	0.0381	0.1238		0.0952	0.0778		0.2714
11.2								0.0097
11.3														0.0476
12	0.3714	0.0238		0.2143	0.2619	0.3952	0.1143	0.068	0.0571	0.0381		0.0048		0.0429		0.0143	0.2286	0.1952	0.2143	0.1095	0.3524		0.1857	0.2278		0.1048
12.2								0.0097
12.3														0.0048
13	0.0381	0.1857		0.0857	0.0952	0.2238	0.1429	0.165	0.119	0.2048				0.0048	0.0143		0.1333	0.1	0.0381	0.3571	0.4143		0.1667	0.1333
13.2								0.1408
14	0.0095	0.3952		0.0429	0.0143	0.0238	0.1429	0.2913	0.0762	0.4524		0.0238		0.2	0.0905		0.0048	0.1619	0.0095	0.1952	0.0667		0.0619	0.05			0.0577
14.2								0.0485
14.3
15		0.2571	0.0095		0.0048	0.0095	0.1524	0.1165	0.1429	0.2286		0.4333		0.019	0.3905			0.0238		0.1714		0.0048	0.0048	0.0944			0.0913
15.2								0.0728
15.3									0.019
16		0.1048	0.0476				0.1286	0.0243	0.2	0.0524		0.3952	0.0238		0.2857			0.0143		0.0143	0.0048			0.0444			0.3269
16.2								0.0291
16.3									0.0333
17		0.0143	0.0429				0.1476		0.0571	0.0048		0.0429	0.2333		0.1381			0.0333						0.0611			0.2692
17.3			0.0143						0.1905
18		0.0095	0.2143				0.0619		0.0097				0.0476		0.0762			0.0857				0.0095		0.0333			0.1923
18.2								0.0049
18.3			0.0095						0.0524
19			0.2333				0.0476						0.219		0.0048			0.0857				0.0714		0.0167			0.0577
19.3			0.019						0.0333
20			0.2333				0.0286						0.1381					0.0476				0.1048		0.0389			0.0048
20.3																		0.019
21			0.0571				0.0095						0.019									0.119		0.0222
21.3																		0.0857
22			0.0667				0.0048						0.0667									0.1286
22.2							0.0048
22.3																		0.0143
23			0.0381				0.0095						0.181									0.1048		0.0056
23.2																						0.0143
24			0.0143										0.0476									0.1524
25													0.0238									0.1619
26																						0.0905
27											0.0238											0.0333
28											0.0905											0.0048
29											0.1667
30											0.2429
30.2											0.0095
31											0.0857
31.2											0.1381
32											0.0048
32.2											0.1905
33.2											0.0381
34.2											0.0048
35											0.0048
2N	210	210	210	210	210	210	210	206	210	210	210	210	210	210	210	210	210	210	210	210	210	210	210	180	210	210	208
K	8	9	13	8	8	6	15	14	13	8	12	6	10	8	7	5	8	14	8	7	7	13	10	17	5	6	7
Obs. Het.	0.685714	0.704762	0.847619	0.857143	0.8	0.733333	0.952381	0.76699	0.857143	0.72381	0.742857	0.514286	0.828571	0.666667	0.752381	0.628571	0.685714	0.87619	0.819048	0.761905	0.657143	0.904762	0.828571	0.711111	0.704762	0.647619	0.752381
Exp. Het.	0.703719	0.731293	0.830975	0.827256	0.780408	0.687619	0.877415	0.840371	0.871293	0.696735	0.840181	0.643583	0.835283	0.715374	0.732608	0.616009	0.717279	0.883492	0.777959	0.778231	0.683492	0.883175	0.82	0.893827	0.731791	0.657959	0.766757
HWE	0.990794	0.871676	0.99326	0.0113106	0.252273	0.944762	0.991832	1.34398e-05	0.961205	0.98355	1.45692e-12	0.000270795	0.363855	0.93843	0.988965	0.353669	0.795286	0.763527	0.958607	0.537605	0.417159	0.402195	0.945547	1.72512e-07	0.457815	0.89295	0.628963	Combined
PD	0.8562	0.8857	0.9509	0.9471	0.918	0.8427	0.9723	0.9576	0.9705	0.8624	0.955	0.8057	0.9525	0.8722	0.8874	0.8128	0.8834	0.9755	0.9172	0.9205	0.8448	0.9747	0.9427	0.9806	0.883	0.8341	0.9111	~1	(1 - 4.15996467581644E-31)
PE	0.4439	0.5012	0.6697	0.6548	0.572	0.4217	0.7511	0.691	0.7432	0.4589	0.6818	0.3762	0.6737	0.4761	0.5061	0.3879	0.4992	0.7662	0.571	0.5785	0.4321	0.7626	0.6409	0.7914	0.4956	0.4169	0.5565	~1	(1 - 2.39354583899877E-11)
* HWE: p-value of the exact test to evalute the Hardy-Weinberg equilibrium (Bonferroni correction level: p<0.00092593); PD: Probability of discrimination; PE: Power of exclusion
