# Supplementary material for: Characterization of 58 STRs and 94 SNPs with the ForenSeq™ DNA Signature Prep Kit in Mexican-Mestizos from the Monterrey City (Northeast, Mexico)
Source: Research Square preprint supplement (doi:10.21203/rs.3.rs-996532/v1), 2021-11-08
Supplement: Supplementary file 2 [file 84dbccf4be854703cbb9fe94.xlsx]

## Sheet: SM2.Nomenclature RSB X-STR
Supplementary Material SM2. Allele nomenclature employed to describe the lenght and sequence variation observed in the 7 X STR loci analyzed with the DNA Signature Prep kit in 105 Mexican Mestizos from Monterrey City (Northeast, Mexico).
Locus	Allele	code	Novroski	AAA	AG	AAGA	AGA	AAGA	AAGG	AAAA	AAGA	sequence
DXS10074	7	7a	9,9'	0	0	7	0	0	0	0	0	AAGAAAGAAAGAAAGAAAGAAAGAAAGA
DXS10074	8	8a	10	0	0	8	0	0	0	0	0	AAGAAAGAAAGAAAGAAAGAAAGAAAGAAAGA
DXS10074	9	9a	11	0	0	9	0	0	0	0	0	AAGAAAGAAAGAAAGAAAGAAAGAAAGAAAGAAAGA
DXS10074	10	10a	12	0	0	10	0	0	0	0	0	AAGAAAGAAAGAAAGAAAGAAAGAAAGAAAGAAAGAAAGA
DXS10074	10	10b	12'	0	0	7	0	0	1	0	2	AAGAAAGAAAGAAAGAAAGAAAGAAAGAAAGGAAGAAAGA
DXS10074	11	11a	13	0	0	11	0	0	0	0	0	AAGAAAGAAAGAAAGAAAGAAAGAAAGAAAGAAAGAAAGAAAGA
DXS10074	12	12a	14	0	0	12	0	0	0	0	0	AAGAAAGAAAGAAAGAAAGAAAGAAAGAAAGAAAGAAAGAAAGAAAGA
DXS10074	13	13a	15'	0	0	13	0	0	0	0	0	AAGAAAGAAAGAAAGAAAGAAAGAAAGAAAGAAAGAAAGAAAGAAAGAAAGA
DXS10074	13	13b	15	0	0	10	0	0	1	0	2	AAGAAAGAAAGAAAGAAAGAAAGAAAGAAAGAAAGAAAGAAAGGAAGAAAGA
DXS10074	13.3	13.3c	15.3	1	0	13	0	0	0	0	0	AAAAAGAAAGAAAGAAAGAAAGAAAGAAAGAAAGAAAGAAAGAAAGAAAGAAAGA
DXS10074	14	14a	16',16'',16.2	0	0	14	0	0	0	0	0	AAGAAAGAAAGAAAGAAAGAAAGAAAGAAAGAAAGAAAGAAAGAAAGAAAGAAAGA
DXS10074	14	14b	16	0	0	11	0	0	1	0	2	AAGAAAGAAAGAAAGAAAGAAAGAAAGAAAGAAAGAAAGAAAGAAAGGAAGAAAGA
DXS10074	15	15a	17,17'''''	0	0	15	0	0	0	0	0	AAGAAAGAAAGAAAGAAAGAAAGAAAGAAAGAAAGAAAGAAAGAAAGAAAGAAAGAAAGA
DXS10074	15	15b	17',17''',17''''	0	0	12	0	0	1	0	2	AAGAAAGAAAGAAAGAAAGAAAGAAAGAAAGAAAGAAAGAAAGAAAGAAAGGAAGAAAGA
DXS10074	15	15d	17''	0	0	12	0	0	1	1	1	AAGAAAGAAAGAAAGAAAGAAAGAAAGAAAGAAAGAAAGAAAGAAAGAAAGGAAAAAAGA
DXS10074	15.3	15.3c	17.3'	1	0	15	0	0	0	0	0	AAAAAGAAAGAAAGAAAGAAAGAAAGAAAGAAAGAAAGAAAGAAAGAAAGAAAGAAAGAAAGA
DXS10074	15.3	15.3e	17.3	0	0	5	1	0	0	0	10	AAGAAAGAAAGAAAGAAAGAAGAAAGAAAGAAAGAAAGAAAGAAAGAAAGAAAGAAAGAAAGA
DXS10074	16	16a	18''''	0	0	16	0	0	0	0	0	AAGAAAGAAAGAAAGAAAGAAAGAAAGAAAGAAAGAAAGAAAGAAAGAAAGAAAGAAAGAAAGA
DXS10074	16	16b	18,18',18'''	0	0	13	0	0	1	0	2	AAGAAAGAAAGAAAGAAAGAAAGAAAGAAAGAAAGAAAGAAAGAAAGAAAGAAAGGAAGAAAGA
DXS10074	16	16d	18''	0	0	13	0	0	1	1	1	AAGAAAGAAAGAAAGAAAGAAAGAAAGAAAGAAAGAAAGAAAGAAAGAAAGAAAGGAAAAAAGA
DXS10074	17	17a	19'''	0	0	17	0	0	0	0	0	AAGAAAGAAAGAAAGAAAGAAAGAAAGAAAGAAAGAAAGAAAGAAAGAAAGAAAGAAAGAAAGGAAGA
DXS10074	17	17b	19'''',19''''',19''''''	0	0	14	0	0	1	0	2	AAGAAAGAAAGAAAGAAAGAAAGAAAGAAAGAAAGAAAGAAAGAAAGAAAGAAAGAAAGGAAGAAAGA
DXS10074	17	17d	19''	0	0	14	0	0	1	1	1	AAGAAAGAAAGAAAGAAAGAAAGAAAGAAAGAAAGAAAGAAAGAAAGAAAGAAAGAAAGGAAAAAAGA
DXS10074	17	17g	19	0	0	12	0	0	3	0	2	AAGAAAGAAAGAAAGAAAGAAAGAAAGAAAGAAAGAAAGAAAGAAAGAAAGGAAGGAAGGAAGAAAGA
DXS10074	17	17h	19'	0	0	16	0	0	1	0	0	AAGAAAGAAAGAAAGAAAGAAAGAAAGAAAGAAAGAAAGAAAGAAAGAAAGAAAGAAAGAAAGAAAGG
DXS10074	17.2	17.2f	18.2	0	1	14	0	0	1	0	2	AGAAGAAAGAAAGAAAGAAAGAAAGAAAGAAAGAAAGAAAGAAAGAAAGAAAGAAAGAAAGGAAGAAAGA
DXS10074	17.3	17.3i	19.3	0	0	8	1	6	1	0	2	AAGAAAGAAAGAAAGAAAGAAAGAAAGAAAGAAGAAAGAAAGAAAGAAAGAAAGAAAGAAAGGAAGAAAGA
DXS10074	18	18b	20,20',20''	0	0	15	0	0	1	0	2	AAGAAAGAAAGAAAGAAAGAAAGAAAGAAAGAAAGAAAGAAAGAAAGAAAGAAAGAAAGAAAGGAAGAAAGA
DXS10074	19	19b	21',21''	0	0	16	0	0	1	0	2	AAGAAAGAAAGAAAGAAAGAAAGAAAGAAAGAAAGAAAGAAAGAAAGAAAGAAAGAAAGAAAGAAAGGAAGAAAGA
DXS10074	19	19d	21	0	0	16	0	0	1	1	1	AAGAAAGAAAGAAAGAAAGAAAGAAAGAAAGAAAGAAAGAAAGAAAGAAAGAAAGAAAGAAAGAAAGGAAAAAAGA
DXS10074	20	20b	22'	0	0	17	0	0	1	0	2	AAGAAAGAAAGAAAGAAAGAAAGAAAGAAAGAAAGAAAGAAAGAAAGAAAGAAAGAAAGAAAGAAAGAAAGGAAGAAAGA
DXS10074	20	20d	22	0	0	17	0	0	1	1	1	AAGAAAGAAAGAAAGAAAGAAAGAAAGAAAGAAAGAAAGAAAGAAAGAAAGAAAGAAAGAAAGAAAGAAAGGAAAAAAGA
DXS10074	21	21b	23	0	0	18	0	0	1	0	2	AAGAAAGAAAGAAAGAAAGAAAGAAAGAAAGAAAGAAAGAAAGAAAGAAAGAAAGAAAGAAAGAAAGAAAGAAAGGAAGAAAGA
Locus	Allele	code	Novroski	TAGA	CTGA	TTGA	CAGA	TGA	TAGA	CAGA	TAGA	sequence
DXS10103	14	14b	14	2	1	0	1	0	6	4	1	TAGATAGACTGACAGATAGATAGATAGATAGATAGATAGACAGACAGACAGACAGATAGA
DXS10103	15	15b	15'	2	1	0	1	0	7	4	1	TAGATAGACTGACAGATAGATAGATAGATAGATAGATAGATAGACAGACAGACAGACAGATAGA
DXS10103	15	15d	15	1	0	1	1	0	8	4	1	TAGATTGACAGATAGATAGATAGATAGATAGATAGATAGATAGACAGACAGACAGACAGATAGA
DXS10103	16	16b	16'	2	1	0	1	0	8	4	1	TAGATAGACTGACAGATAGATAGATAGATAGATAGATAGATAGATAGACAGACAGACAGACAGATAGA
DXS10103	16	16d	16	1	0	1	1	0	9	4	1	TAGATTGACAGATAGATAGATAGATAGATAGATAGATAGATAGATAGACAGACAGACAGACAGATAGA
DXS10103	16	16e	16''	2	1	0	1	0	9	4	0	TAGATAGACTGACAGATAGATAGATAGATAGATAGATAGATAGATAGATAGACAGACAGACAGACAGA
DXS10103	17	17b	17	2	1	0	1	0	9	4	1	TAGATAGACTGACAGATAGATAGATAGATAGATAGATAGATAGATAGATAGACAGACAGACAGACAGATAGA
DXS10103	17	17c	17'''	2	1	0	1	0	8	5	1	TAGATAGACTGACAGATAGATAGATAGATAGATAGATAGATAGATAGACAGACAGACAGACAGACAGATAGA
DXS10103	17	17d	17'	1	0	1	1	0	10	4	1	TAGATTGACAGATAGATAGATAGATAGATAGATAGATAGATAGATAGATAGACAGACAGACAGACAGATAGA
DXS10103	17	17f	17''	2	0	0	1	0	10	4	1	TAGATAGACAGATAGATAGATAGATAGATAGATAGATAGATAGATAGATAGACAGACAGACAGACAGATAGA
DXS10103	18	18a	18''	2	1	0	1	0	11	3	1	TAGATAGACTGACAGATAGATAGATAGATAGATAGATAGATAGATAGATAGATAGATAGACAGACAGACAGATAGA
DXS10103	18	18b	18'	2	1	0	1	0	10	4	1	TAGATAGACTGACAGATAGATAGATAGATAGATAGATAGATAGATAGATAGATAGACAGACAGACAGACAGATAGA
DXS10103	18	18c	18'''	2	1	0	1	0	9	5	1	TAGATAGACTGACAGATAGATAGATAGATAGATAGATAGATAGATAGATAGACAGACAGACAGACAGACAGATAGA
DXS10103	18	18d	18	1	0	1	1	0	11	4	1	TAGATTGACAGATAGATAGATAGATAGATAGATAGATAGATAGATAGATAGATAGACAGACAGACAGACAGATAGA
DXS10103	19	19b	19''	2	1	0	1	0	11	4	1	TAGATAGACTGACAGATAGATAGATAGATAGATAGATAGATAGATAGATAGATAGATAGACAGACAGACAGACAGATAGA
DXS10103	19	19c	19'	2	1	0	1	0	10	5	1	TAGATAGACTGACAGATAGATAGATAGATAGATAGATAGATAGATAGATAGATAGACAGACAGACAGACAGACAGATAGA
DXS10103	19	19d	19	2	1	0	1	0	12	4	1	TAGATTGACAGATAGATAGATAGATAGATAGATAGATAGATAGATAGATAGATAGATAGACAGACAGACAGACAGATAGA
DXS10103	19	19.3g	19.3	2	1	0	1	1	11	4	1	TAGATAGACTGACAGATGATAGATAGATAGATAGATAGATAGATAGATAGATAGATAGATAGACAGACAGACAGACAGATAGA
DXS10103	20	20b	20'	2	1	0	1	0	12	4	1	TAGATAGACTGACAGATAGATAGATAGATAGATAGATAGATAGATAGATAGATAGATAGATAGACAGACAGACAGACAGATAGA
DXS10103	20	20c	20	2	1	0	1	0	11	5	1	TAGATAGACTGACAGATAGATAGATAGATAGATAGATAGATAGATAGATAGATAGATAGACAGACAGACAGACAGACAGATAGA
DXS10103	21	21b	21'	2	1	0	1	0	13	4	1	TAGATAGACTGACAGATAGATAGATAGATAGATAGATAGATAGATAGATAGATAGATAGATAGATAGACAGACAGACAGACAGATAGA
DXS10103	21	21c	21	2	1	0	1	0	12	5	1	TAGATAGACTGACAGATAGATAGATAGATAGATAGATAGATAGATAGATAGATAGATAGATAGACAGACAGACAGACAGACAGATAGA
DXS10103	22	22b	22	2	1	0	1	0	13	5	1	TAGATAGACTGACAGATAGATAGATAGATAGATAGATAGATAGATAGATAGATAGATAGATAGATAGACAGACAGACAGACAGACAGATAGA
Locus	Allele	code	Novroski	AAGA	GAAAGGA	AAGA	A	GGG	AAGG	AAGA	AAGG	AAGA	GA	AAGG	AAGA	AAAG	AGAATAGAAAAGA	AGA	GAAGAGAAAAGAGAAAAGAAA	AAAGAAAAGAAA	sequence
DXS10135	13	13a		3	1	9	0	0	0	0	0	0	0	0	0	1	1	1	1	1	AAGAAAGAAAGAGAAAGGAAAGAAAGAAAGAAAGAAAGAAAGAAAGAAAGAAAGAAAAGAGAATAGAAAAGAAGAGAAGAGAAAAGAGAAAAGAAAAAAGAAAAGAAA
DXS10135	14	14a		3	1	11	0	0	0	0	0	0	0	0	0	1	1	1	1	1	AAGAAAGAAAGAGAAAGGAAAGAAAGAAAGAAAGAAAGAAAGAAAGAAAGAAAGAAAGAAAAGAGAATAGAAAAGAAGAGAAGAGAAAAGAGAAAAGAAAAAAGAAAAGAAA
DXS10135	15	15a	15	3	1	11	0	0	0	0	0	0	0	0	0	1	1	1	1	1	AAGAAAGAAAGAGAAAGGAAAGAAAGAAAGAAAGAAAGAAAGAAAGAAAGAAAGAAAGAAAGAAAAGAGAATAGAAAAGAAGAGAAGAGAAAAGAGAAAAGAAAAAAGAAAAGAAA
DXS10135	15.1	15.1i	15.1	3	1	12	0	0	0	0	0	0	0	0	0	1	1	0	1	1	AAGAAAGAAAGAGAAAGGAAAGAAAGAAAGAAAGAAAGAAAGAAAGAAAGAAAGAAAGAAAGAAAGAAAAGAGAATAGAAAAGAGAAGAGAAAAGAGAAAAGAAAAAAGAAAAGAAA
DXS10135	16	16a	16'	3	1	12	0	0	0	0	0	0	0	0	0	1	1	1	1	1	AAGAAAGAAAGAGAAAGGAAAGAAAGAAAGAAAGAAAGAAAGAAAGAAAGAAAGAAAGAAAGAAAGAAAAGAGAATAGAAAAGAAGAGAAGAGAAAAGAGAAAAGAAAAAAGAAAAGAAA
DXS10135	16	16b	16	3	1	10	0	0	0	0	1	1	0	0	0	1	1	1	1	1	AAGAAAGAAAGAGAAAGGAAAGAAAGAAAGAAAGAAAGAAAGAAAGAAAGAAAGAAAGAAAGGAAGAAAAGAGAATAGAAAAGAAGAGAAGAGAAAAGAGAAAAGAAAAAAGAAAAGAAA
DXS10135	17	17a	17	3	1	11	0	0	0	0	0	0	0	0	0	1	1	1	1	1	AAGAAAGAAAGAGAAAGGAAAGAAAGAAAGAAAGAAAGAAAGAAAGAAAGAAAGAAAGAAAGAAAGAAAGAAAAGAGAATAGAAAAGAAGAGAAGAGAAAAGAGAAAAGAAAAAAGAAAAGAAA
DXS10135	17	17b	17'	3	1	11	0	0	0	0	1	1	0	0	0	1	1	1	1	1	AAGAAAGAAAGAGAAAGGAAAGAAAGAAAGAAAGAAAGAAAGAAAGAAAGAAAGAAAGAAAGAAAGGAAGAAAAGAGAATAGAAAAGAAGAGAAGAGAAAAGAGAAAAGAAAAAAGAAAAGAAA
DXS10135	17.1	17.1i	17.1	3	1	14	0	0	0	0	0	0	0	0	0	1	1	0	1	1	AAGAAAGAAAGAGAAAGGAAAGAAAGAAAGAAAGAAAGAAAGAAAGAAAGAAAGAAAGAAAGAAAGAAAGAAAGAAAAGAGAATAGAAAAGAGAAGAGAAAAGAGAAAAGAAAAAAGAAAAGAAA
DXS10135	18	18a	18'	3	1	14	0	0	0	0	0	0	0	0	0	1	1	1	1	1	AAGAAAGAAAGAGAAAGGAAAGAAAGAAAGAAAGAAAGAAAGAAAGAAAGAAAGAAAGAAAGAAAGAAAGAAAGAAAAGAGAATAGAAAAGAAGAGAAGAGAAAAGAGAAAAGAAAAAAGAAAAGAAA
DXS10135	18	18b	18	3	1	12	0	0	0	0	1	1	0	0	0	1	1	1	1	1	AAGAAAGAAAGAGAAAGGAAAGAAAGAAAGAAAGAAAGAAAGAAAGAAAGAAAGAAAGAAAGAAAGAAAGGAAGAAAAGAGAATAGAAAAGAAGAGAAGAGAAAAGAGAAAAGAAAAAAGAAAAGAAA
DXS10135	18.1	18.1i	18.1	3	1	15	0	0	0	0	0	0	0	0	0	1	1	0	1	1	AAGAAAGAAAGAGAAAGGAAAGAAAGAAAGAAAGAAAGAAAGAAAGAAAGAAAGAAAGAAAGAAAGAAAGAAAGAAAGAAAAGAGAATAGAAAAGAGAAGAGAAAAGAGAAAAGAAAAAAGAAAAGAAA
DXS10135	19	19a	19'	3	1	15	0	0	0	0	0	0	0	0	0	1	1	1	1	1	AAGAAAGAAAGAGAAAGGAAAGAAAGAAAGAAAGAAAGAAAGAAAGAAAGAAAGAAAGAAAGAAAGAAAGAAAGAAAGAAAAGAGAATAGAAAAGAAGAGAAGAGAAAAGAGAAAAGAAAAAAGAAAAGAAA
DXS10135	19	19b	19	3	1	13	0	0	0	0	1	1	0	0	0	1	1	1	1	1	AAGAAAGAAAGAGAAAGGAAAGAAAGAAAGAAAGAAAGAAAGAAAGAAAGAAAGAAAGAAAGAAAGAAAGAAAGGAAGAAAAGAGAATAGAAAAGAAGAGAAGAGAAAAGAGAAAAGAAAAAAGAAAAGAAA
DXS10135	19	19c	19''	3	1	12	0	0	0	0	2	1	0	0	0	1	1	1	1	1	AAGAAAGAAAGAGAAAGGAAAGAAAGAAAGAAAGAAAGAAAGAAAGAAAGAAAGAAAGAAAGAAAGGAAGGAAGGAAGAAAAGAGAATAGAAAAGAAGAGAAGAGAAAAGAGAAAAGAAAAAAGAAAAGAAA
DXS10135	19.1	19.1i	19.1	3	1	16	0	0	0	0	0	0	0	0	0	1	1	0	1	1	AAGAAAGAAAGAGAAAGGAAAGAAAGAAAGAAAGAAAGAAAGAAAGAAAGAAAGAAAGAAAGAAAGAAAGAAAGAAAGAAAGAAAAGAGAATAGAAAAGAGAAGAGAAAAGAGAAAAGAAAAAAGAAAAGAAA
DXS10135	20	20a	20'	3	1	16	0	0	0	0	0	0	0	0	0	1	1	1	1	1	AAGAAAGAAAGAGAAAGGAAAGAAAGAAAGAAAGAAAGAAAGAAAGAAAGAAAGAAAGAAAGAAAGAAAGAAAGAAAGAAAGAAAAGAGAATAGAAAAGAAGAGAAGAGAAAAGAGAAAAGAAAAAAGAAAAGAAA
DXS10135	20	20b	20	3	1	14	0	0	0	0	1	1	0	0	0	1	1	1	1	1	AAGAAAGAAAGAGAAAGGAAAGAAAGAAAGAAAGAAAGAAAGAAAGAAAGAAAGAAAGAAAGAAAGAAAGAAAGAAAGGAAGAAAAGAGAATAGAAAAGAAGAGAAGAGAAAAGAGAAAAGAAAAAAGAAAAGAAA
DXS10135	20	20d	20''	3	1	12	0	0	0	0	3	1	0	0	0	1	1	1	1	1	AAGAAAGAAAGAGAAAGGAAAGAAAGAAAGAAAGAAAGAAAGAAAGAAAGAAAGAAAGAAAGAAAGAAAGGAAGGAAGGAAGAAAAGAGAATAGAAAAGAAGAGAAGAGAAAAGAGAAAAGAAAAAAGAAAAGAAA
DXS10135	20.1	20.1i	20.1	3	1	17	0	0	0	0	0	0	0	0	0	1	1	0	1	1	AAGAAAGAAAGAGAAAGGAAAGAAAGAAAGAAAGAAAGAAAGAAAGAAAGAAAGAAAGAAAGAAAGAAAGAAAGAAAGAAAGAAAGAAAAGAGAATAGAAAAGAGAAGAGAAAAGAGAAAAGAAAAAAGAAAAGAAA
DXS10135	21	21a	21''	3	1	17	0	0	0	0	0	0	0	0	0	1	1	1	1	1	AAGAAAGAAAGAGAAAGGAAAGAAAGAAAGAAAGAAAGAAAGAAAGAAAGAAAGAAAGAAAGAAAGAAAGAAAGAAAGAAAGAAAGAAAAGAGAATAGAAAAGAAGAGAAGAGAAAAGAGAAAAGAAAAAAGAAAAGAAA
DXS10135	21	21b	21'	3	1	15	0	0	0	0	1	1	0	0	0	1	1	1	1	1	AAGAAAGAAAGAGAAAGGAAAGAAAGAAAGAAAGAAAGAAAGAAAGAAAGAAAGAAAGAAAGAAAGAAAGAAAGAAAGAAAGGAAGAAAAGAGAATAGAAAAGAAGAGAAGAGAAAAGAGAAAAGAAAAAAGAAAAGAAA
DXS10135	21	21c	21''''	3	1	14	0	0	0	0	2	1	0	0	0	1	1	1	1	1	AAGAAAGAAAGAGAAAGGAAAGAAAGAAAGAAAGAAAGAAAGAAAGAAAGAAAGAAAGAAAGAAAGAAAGAAAGGAAGGAAGGAAGAAAAGAGAATAGAAAAGAAGAGAAGAGAAAAGAGAAAAGAAAAAAGAAAAGAAA
DXS10135	21	21d	21	3	1	13	0	0	0	0	3	1	0	0	0	1	1	1	1	1	AAGAAAGAAAGAGAAAGGAAAGAAAGAAAGAAAGAAAGAAAGAAAGAAAGAAAGAAAGAAAGAAAGAAAGAAAGGAAGGAAGGAAGAAAAGAGAATAGAAAAGAAGAGAAGAGAAAAGAGAAAAGAAAAAAGAAAAGAAA
DXS10135	21	21k	21'''	3	1	17	0	0	0	0	0	0	0	1	0	0	1	1	1	1	AAGAAAGAAAGAGAAAGGAAAGAAAGAAAGAAAGAAAGAAAGAAAGAAAGAAAGAAAGAAAGAAAGAAAGAAAGAAAGAAAGAAAGAAAGGAGAATAGAAAAGAAGAGAAGAGAAAAGAGAAAAGAAAAAAGAAAAGAAA
DXS10135	21.1	21.1i	21.1	3	1	18	0	0	0	0	0	0	0	0	0	1	1	0	1	1	AAGAAAGAAAGAGAAAGGAAAGAAAGAAAGAAAGAAAGAAAGAAAGAAAGAAAGAAAGAAAGAAAGAAAGAAAGAAAGAAAGAAAGAAAGAAAAGAGAATAGAAAAGAGAAGAGAAAAGAGAAAAGAAAAAAGAAAAGAAA
DXS10135	22	22a	22''	3	1	18	0	0	0	0	0	0	0	0	0	1	1	1	1	1	AAGAAAGAAAGAGAAAGGAAAGAAAGAAAGAAAGAAAGAAAGAAAGAAAGAAAGAAAGAAAGAAAGAAAGAAAGAAAGAAAGAAAGAAAGAAAAGAGAATAGAAAAGAAGAGAAGAGAAAAGAGAAAAGAAAAAAGAAAAGAAA
DXS10135	22	22b	22'''	3	1	16	0	0	0	0	1	1	0	0	0	1	1	1	1	1	AAGAAAGAAAGAGAAAGGAAAGAAAGAAAGAAAGAAAGAAAGAAAGAAAGAAAGAAAGAAAGAAAGAAAGAAAGAAAGAAAGAAAGGAAGAAAAGAGAATAGAAAAGAAGAGAAGAGAAAAGAGAAAAGAAAAAAGAAAAGAAA
DXS10135	22	22d	22'	3	1	14	0	0	0	0	3	1	0	0	0	1	1	1	1	1	AAGAAAGAAAGAGAAAGGAAAGAAAGAAAGAAAGAAAGAAAGAAAGAAAGAAAGAAAGAAAGAAAGAAAGAAAGAAAGGAAGGAAGGAAGAAAAGAGAATAGAAAAGAAGAGAAGAGAAAAGAGAAAAGAAAAAAGAAAAGAAA
DXS10135	22	22e	22	3	1	13	0	0	0	0	4	1	0	0	0	1	1	1	1	1	AAGAAAGAAAGAGAAAGGAAAGAAAGAAAGAAAGAAAGAAAGAAAGAAAGAAAGAAAGAAAGAAAGAAAGAAAGGAAGGAAGGAAGGAAGAAAAGAGAATAGAAAAGAAGAGAAGAGAAAAGAGAAAAGAAAAAAGAAAAGAAA
DXS10135	22	22f	new	3	1	12	0	0	0	0	1	3	0	1	1	1	1	1	1	1	AAGAAAGAAAGAGAAAGGAAAGAAAGAAAGAAAGAAAGAAAGAAAGAAAGAAAGAAAGAAAGAAAGAAAGGAAGAAAGAAAGAAAGGAAGAAAAGAGAATAGAAAAGAAGAGAAGAGAAAAGAGAAAAGAAAAAAGAAAAGAAA
DXS10135	22.1	22.1i	22.1	3	1	19	0	0	0	0	0	0	0	0	0	1	1	0	1	1	AAGAAAGAAAGAGAAAGGAAAGAAAGAAAGAAAGAAAGAAAGAAAGAAAGAAAGAAAGAAAGAAAGAAAGAAAGAAAGAAAGAAAGAAAGAAAGAAAAGAGAATAGAAAAGAGAAGAGAAAAGAGAAAAGAAAAAAGAAAAGAAA
DXS10135	23	23a	23'''	3	1	19	0	0	0	0	0	0	0	0	0	1	1	1	1	1	AAGAAAGAAAGAGAAAGGAAAGAAAGAAAGAAAGAAAGAAAGAAAGAAAGAAAGAAAGAAAGAAAGAAAGAAAGAAAGAAAGAAAGAAAGAAAGAAAAGAGAATAGAAAAGAAGAGAAGAGAAAAGAGAAAAGAAAAAAGAAAAGAAA
DXS10135	23	23b	23''	3	1	17	0	0	0	0	1	1	0	0	0	1	1	1	1	1	AAGAAAGAAAGAGAAAGGAAAGAAAGAAAGAAAGAAAGAAAGAAAGAAAGAAAGAAAGAAAGAAAGAAAGAAAGAAAGAAAGAAAGAAAGGAAGAAAAGAGAATAGAAAAGAAGAGAAGAGAAAAGAGAAAAGAAAAAAGAAAAGAAA
DXS10135	23	23d	23'	3	1	15	0	0	0	0	3	1	0	0	0	1	1	1	1	1	AAGAAAGAAAGAGAAAGGAAAGAAAGAAAGAAAGAAAGAAAGAAAGAAAGAAAGAAAGAAAGAAAGAAAGAAAGAAAGAAAGGAAGGAAGGAAGAAAAGAGAATAGAAAAGAAGAGAAGAGAAAAGAGAAAAGAAAAAAGAAAAGAAA
DXS10135	23	23e	23''''	3	1	14	0	0	0	0	4	1	0	0	0	1	1	1	1	1	AAGAAAGAAAGAGAAAGGAAAGAAAGAAAGAAAGAAAGAAAGAAAGAAAGAAAGAAAGAAAGAAAGAAAGAAAGAAAGGAAGGAAGGAAGGAAGAAAAGAGAATAGAAAAGAAGAGAAGAGAAAAGAGAAAAGAAAAAAGAAAAGAAA
DXS10135	23	23f	23	3	1	13	0	0	0	0	1	3	0	1	1	1	1	1	1	1	AAGAAAGAAAGAGAAAGGAAAGAAAGAAAGAAAGAAAGAAAGAAAGAAAGAAAGAAAGAAAGAAAGAAAGAAAGGAAGAAAGAAAGAAAGGAAGAAAAGAGAATAGAAAAGAAGAGAAGAGAAAAGAGAAAAGAAAAAAGAAAAGAAA
DXS10135	23.1	23.1i	23.1	3	1	20	0	0	0	0	0	0	0	0	0	1	1	0	1	1	AAGAAAGAAAGAGAAAGGAAAGAAAGAAAGAAAGAAAGAAAGAAAGAAAGAAAGAAAGAAAGAAAGAAAGAAAGAAAGAAAGAAAGAAAGAAAGAAAGAAAAGAGAATAGAAAAGAGAAGAGAAAAGAGAAAAGAAAAAAGAAAAGAAA
DXS10135	23.2	23.2l	23.2	3	1	14	0	0	0	0	0	0	1	0	5	1	1	1	1	1	AAGAAAGAAAGAGAAAGGAAAGAAAGAAAGAAAGAAAGAAAGAAAGAAAGAAAGAAAGAAAGAAAGAAAGAAAGAGAAAGAAAGAAAGAAAGAAAGAAAAGAGAATAGAAAAGAAGAGAAGAGAAAAGAGAAAAGAAAAAAGAAAAGAAA
DXS10135	24	24a	24'''	3	1	20	0	0	0	0	0	0	0	0	0	1	1	1	1	1	AAGAAAGAAAGAGAAAGGAAAGAAAGAAAGAAAGAAAGAAAGAAAGAAAGAAAGAAAGAAAGAAAGAAAGAAAGAAAGAAAGAAAGAAAGAAAGAAAGAAAAGAGAATAGAAAAGAAGAGAAGAGAAAAGAGAAAAGAAAAAAGAAAAGAAA
DXS10135	24	24b	24'''''	3	1	18	0	0	0	0	1	1	0	0	0	1	1	1	1	1	AAGAAAGAAAGAGAAAGGAAAGAAAGAAAGAAAGAAAGAAAGAAAGAAAGAAAGAAAGAAAGAAAGAAAGAAAGAAAGAAAGAAAGAAAGAAAGGAAGAAAAGAGAATAGAAAAGAAGAGAAGAGAAAAGAGAAAAGAAAAAAGAAAAGAAA
DXS10135	24	24c	24''	3	1	17	0	0	0	0	2	1	0	0	0	1	1	1	1	1	AAGAAAGAAAGAGAAAGGAAAGAAAGAAAGAAAGAAAGAAAGAAAGAAAGAAAGAAAGAAAGAAAGAAAGAAAGAAAGAAAGAAAGAAAGGAAGGAAGAAAAGAGAATAGAAAAGAAGAGAAGAGAAAAGAGAAAAGAAAAAAGAAAAGAAA
DXS10135	24	24d	24'	3	1	16	0	0	0	0	3	1	0	0	0	1	1	1	1	1	AAGAAAGAAAGAGAAAGGAAAGAAAGAAAGAAAGAAAGAAAGAAAGAAAGAAAGAAAGAAAGAAAGAAAGAAAGAAAGAAAGAAAGGAAGGAAGGAAGAAAAGAGAATAGAAAAGAAGAGAAGAGAAAAGAGAAAAGAAAAAAGAAAAGAAA
DXS10135	24	24e	24	3	1	15	0	0	0	0	4	1	0	0	0	1	1	1	1	1	AAGAAAGAAAGAGAAAGGAAAGAAAGAAAGAAAGAAAGAAAGAAAGAAAGAAAGAAAGAAAGAAAGAAAGAAAGAAAGAAAGGAAGGAAGGAAGGAAGAAAAGAGAATAGAAAAGAAGAGAAGAGAAAAGAGAAAAGAAAAAAGAAAAGAAA
DXS10135	24	24f	24''''	3	1	14	0	0	0	0	1	3	0	1	1	1	1	1	1	1	AAGAAAGAAAGAGAAAGGAAAGAAAGAAAGAAAGAAAGAAAGAAAGAAAGAAAGAAAGAAAGAAAGAAAGAAAGAAAGGAAGAAAGAAAGAAAGGAAGAAAAGAGAATAGAAAAGAAGAGAAGAGAAAAGAGAAAAGAAAAAAGAAAAGAAA
DXS10135	24	24g		3	1	16	1	1	2	1	0	0	0	0	0	1	1	1	1	1	AAGAAAGAAAGAGAAAGGAAAGAAAGAAAGAAAGAAAGAAAGAAAGAAAGAAAGAAAGAAAGAAAGAAAGAAAGAAAGAAAGAAGGGAAGGAAGGAAGAAAAGAGAATAGAAAAGAAGAGAAGAGAAAAGAGAAAAGAAAAAAGAAAAGAAA
DXS10135	24.1	24.1i	24.1	3	1	21	0	0	0	0	0	0	0	0	0	1	1	0	1	1	AAGAAAGAAAGAGAAAGGAAAGAAAGAAAGAAAGAAAGAAAGAAAGAAAGAAAGAAAGAAAGAAAGAAAGAAAGAAAGAAAGAAAGAAAGAAAGAAAGAAAGAAAAGAGAATAGAAAAGAGAAGAGAAAAGAGAAAAGAAAAAAGAAAAGAAA
DXS10135	25	25a	25'''	3	1	21	0	0	0	0	0	0	0	0	0	1	1	1	1	1	AAGAAAGAAAGAGAAAGGAAAGAAAGAAAGAAAGAAAGAAAGAAAGAAAGAAAGAAAGAAAGAAAGAAAGAAAGAAAGAAAGAAAGAAAGAAAGAAAGAAAGAAAAGAGAATAGAAAAGAAGAGAAGAGAAAAGAGAAAAGAAAAAAGAAAAGAAA
DXS10135	25	25b	25''''	3	1	19	0	0	0	0	1	1	0	0	0	1	1	1	1	1	AAGAAAGAAAGAGAAAGGAAAGAAAGAAAGAAAGAAAGAAAGAAAGAAAGAAAGAAAGAAAGAAAGAAAGAAAGAAAGAAAGAAAGAAAGAAAGAAAGGAAGAAAAGAGAATAGAAAAGAAGAGAAGAGAAAAGAGAAAAGAAAAAAGAAAAGAAA
DXS10135	25	25j	new	3	1	24	0	0	0	0	1	3	0	1	1	1	1	1	1	0	AAGAAAGAAAGAGAAAGGAAAGAAAGAAAGAAAGAAAGAAAGAAAGAAAGAAAGAAAGAAAGAAAGAAAGAAAGAAAGAAAGAAAGAAAGAAAGGAAGAAAGAAAGAAAGGAAGAAAAGAGAATAGAAAAGAAGAGAAGAGAAAAGAGAAAAGAAA
DXS10135	25	25c	new	3	1	18	0	0	0	0	2	1	0	0	0	1	1	1	1	1	AAGAAAGAAAGAGAAAGGAAAGAAAGAAAGAAAGAAAGAAAGAAAGAAAGAAAGAAAGAAAGAAAGAAAGAAAGAAAGAAAGAAAGAAAGAAAGGAAGGAAGAAAAGAGAATAGAAAAGAAGAGAAGAGAAAAGAGAAAAGAAAAAAGAAAAGAAA
DXS10135	25	25d	25'	3	1	17	0	0	0	0	3	1	0	0	0	1	1	1	1	1	AAGAAAGAAAGAGAAAGGAAAGAAAGAAAGAAAGAAAGAAAGAAAGAAAGAAAGAAAGAAAGAAAGAAAGAAAGAAAGAAAGAAAGAAAGGAAGGAAGGAAGAAAAGAGAATAGAAAAGAAGAGAAGAGAAAAGAGAAAAGAAAAAAGAAAAGAAA
DXS10135	25	25e	25''	3	1	16	0	0	0	0	4	1	0	0	0	1	1	1	1	1	AAGAAAGAAAGAGAAAGGAAAGAAAGAAAGAAAGAAAGAAAGAAAGAAAGAAAGAAAGAAAGAAAGAAAGAAAGAAAGAAAGAAAGGAAGGAAGGAAGGAAGAAAAGAGAATAGAAAAGAAGAGAAGAGAAAAGAGAAAAGAAAAAAGAAAAGAAA
DXS10135	25	25f	25	3	1	15	0	0	0	0	1	3	0	1	1	1	1	1	1	1	AAGAAAGAAAGAGAAAGGAAAGAAAGAAAGAAAGAAAGAAAGAAAGAAAGAAAGAAAGAAAGAAAGAAAGAAAGAAAGAAAGGAAGAAAGAAAGAAAGGAAGAAAAGAGAATAGAAAAGAAGAGAAGAGAAAAGAGAAAAGAAAAAAGAAAAGAAA
DXS10135	25.1	25.1i	25.1	3	1	22	0	0	0	0	0	0	0	0	0	1	1	0	1	1	AAGAAAGAAAGAGAAAGGAAAGAAAGAAAGAAAGAAAGAAAGAAAGAAAGAAAGAAAGAAAGAAAGAAAGAAAGAAAGAAAGAAAGAAAGAAAGAAAGAAAGAAAGAAAAGAGAATAGAAAAGAGAAGAGAAAAGAGAAAAGAAAAAAGAAAAGAAA
DXS10135	26	26a	26'''	3	1	22	0	0	0	0	0	0	0	0	0	1	1	1	1	1	AAGAAAGAAAGAGAAAGGAAAGAAAGAAAGAAAGAAAGAAAGAAAGAAAGAAAGAAAGAAAGAAAGAAAGAAAGAAAGAAAGAAAGAAAGAAAGAAAGAAAGAAAGAAAAGAGAATAGAAAAGAAGAGAAGAGAAAAGAGAAAAGAAAAAAGAAAAGAAA
DXS10135	26	26j	new	3	1	23	0	0	0	0	1	3	0	1	1	1	1	1	1	0	AAGAAAGAAAGAGAAAGGAAAGAAAGAAAGAAAGAAAGAAAGAAAGAAAGAAAGAAAGAAAGAAAGAAAGAAAGAAAGAAAGAAAGAAAGAAAGAAAGGAAGAAAGAAAGAAAGGAAGAAAAGAGAATAGAAAAGAAGAGAAGAGAAAAGAGAAAAGAAA
DXS10135	26	26d	26''	3	1	18	0	0	0	0	3	1	0	0	0	1	1	1	1	1	AAGAAAGAAAGAGAAAGGAAAGAAAGAAAGAAAGAAAGAAAGAAAGAAAGAAAGAAAGAAAGAAAGAAAGAAAGAAAGAAAGAAAGAAAGAAAGGAAGGAAGGAAGAAAAGAGAATAGAAAAGAAGAGAAGAGAAAAGAGAAAAGAAAAAAGAAAAGAAA
DXS10135	26	26e	26'	3	1	17	0	0	0	0	4	1	0	0	0	1	1	1	1	1	AAGAAAGAAAGAGAAAGGAAAGAAAGAAAGAAAGAAAGAAAGAAAGAAAGAAAGAAAGAAAGAAAGAAAGAAAGAAAGAAAGAAAGAAAGGAAGGAAGGAAGGAAGAAAAGAGAATAGAAAAGAAGAGAAGAGAAAAGAGAAAAGAAAAAAGAAAAGAAA
DXS10135	26	26f	26	3	1	16	0	0	0	0	1	3	0	1	1	1	1	1	1	1	AAGAAAGAAAGAGAAAGGAAAGAAAGAAAGAAAGAAAGAAAGAAAGAAAGAAAGAAAGAAAGAAAGAAAGAAAGAAAGAAAGAAAGGAAGAAAGAAAGAAAGGAAGAAAAGAGAATAGAAAAGAAGAGAAGAGAAAAGAGAAAAGAAAAAAGAAAAGAAA
DXS10135	26	26k	26''''	3	1	22	0	0	0	0	0	0	0	1	0	0	1	1	1	1	AAGAAAGAAAGAGAAAGGAAAGAAAGAAAGAAAGAAAGAAAGAAAGAAAGAAAGAAAGAAAGAAAGAAAGAAAGAAAGAAAGAAAGAAAGAAAGAAAGAAAGAAAGAAAGGAGAATAGAAAAGAAGAGAAGAGAAAAGAGAAAAGAAAAAAGAAAAGAAA
DXS10135	26.1	26.1i	26.1	3	1	23	0	0	0	0	0	0	0	0	0	1	1	0	1	1	AAGAAAGAAAGAGAAAGGAAAGAAAGAAAGAAAGAAAGAAAGAAAGAAAGAAAGAAAGAAAGAAAGAAAGAAAGAAAGAAAGAAAGAAAGAAAGAAAGAAAGAAAGAAAGAAAAGAGAATAGAAAAGAGAAGAGAAAAGAGAAAAGAAAAAAGAAAAGAAA
DXS10135	27	27a	27'''''	3	1	23	0	0	0	0	0	0	0	0	0	1	1	1	1	1	AAGAAAGAAAGAGAAAGGAAAGAAAGAAAGAAAGAAAGAAAGAAAGAAAGAAAGAAAGAAAGAAAGAAAGAAAGAAAGAAAGAAAGAAAGAAAGAAAGAAAGAAAGAAAGAAAAGAGAATAGAAAAGAAGAGAAGAGAAAAGAGAAAAGAAAAAAGAAAAGAAA
DXS10135	27	27b	27''''	3	1	21	0	0	0	0	1	1	0	0	0	1	1	1	1	1	AAGAAAGAAAGAGAAAGGAAAGAAAGAAAGAAAGAAAGAAAGAAAGAAAGAAAGAAAGAAAGAAAGAAAGAAAGAAAGAAAGAAAGAAAGAAAGAAAGAAAGAAAGGAAGAAAAGAGAATAGAAAAGAAGAGAAGAGAAAAGAGAAAAGAAAAAAGAAAAGAAA
DXS10135	27	27c	27'''	3	1	20	0	0	0	0	2	1	0	0	0	1	1	1	1	1	AAGAAAGAAAGAGAAAGGAAAGAAAGAAAGAAAGAAAGAAAGAAAGAAAGAAAGAAAGAAAGAAAGAAAGAAAGAAAGAAAGAAAGAAAGAAAGAAAGAAAGGAAGGAAGAAAAGAGAATAGAAAAGAAGAGAAGAGAAAAGAGAAAAGAAAAAAGAAAAGAAA
DXS10135	27	27d	27''	3	1	19	0	0	0	0	3	1	0	0	0	1	1	1	1	1	AAGAAAGAAAGAGAAAGGAAAGAAAGAAAGAAAGAAAGAAAGAAAGAAAGAAAGAAAGAAAGAAAGAAAGAAAGAAAGAAAGAAAGAAAGAAAGAAAGGAAGGAAGGAAGAAAAGAGAATAGAAAAGAAGAGAAGAGAAAAGAGAAAAGAAAAAAGAAAAGAAA
DXS10135	27	27e	27'	3	1	18	0	0	0	0	4	1	0	0	0	1	1	1	1	1	AAGAAAGAAAGAGAAAGGAAAGAAAGAAAGAAAGAAAGAAAGAAAGAAAGAAAGAAAGAAAGAAAGAAAGAAAGAAAGAAAGAAAGAAAGAAAGGAAGGAAGGAAGGAAGAAAAGAGAATAGAAAAGAAGAGAAGAGAAAAGAGAAAAGAAAAAAGAAAAGAAA
DXS10135	27	27f	27	3	1	17	0	0	0	0	1	3	0	1	1	1	1	1	1	1	AAGAAAGAAAGAGAAAGGAAAGAAAGAAAGAAAGAAAGAAAGAAAGAAAGAAAGAAAGAAAGAAAGAAAGAAAGAAAGAAAGAAAGAAAGGAAGAAAGAAAGAAAGGAAGAAAAGAGAATAGAAAAGAAGAGAAGAGAAAAGAGAAAAGAAAAAAGAAAAGAAA
DXS10135	27	27k	27''''''	3	1	23	0	0	0	0	0	0	0	1	0	0	1	1	1	1	AAGAAAGAAAGAGAAAGGAAAGAAAGAAAGAAAGAAAGAAAGAAAGAAAGAAAGAAAGAAAGAAAGAAAGAAAGAAAGAAAGAAAGAAAGAAAGAAAGAAAGAAAGAAAGAAAGGAGAATAGAAAAGAAGAGAAGAGAAAAGAGAAAAGAAAAAAGAAAAGAAA
DXS10135	27.2	27.2m	27.2	3	1	9	0	0	0	0	0	0	1	0	14	1	1	1	1	1	AAGAAAGAAAGAGAAAGGAAAGAAAGAAAGAAAGAAAGAAAGAAAGAAAGAAAGAGAAAGAAAGAAAGAAAGAAAGAAAGAAAGAAAGAAAGAAAGAAAGAAAGAAAGAAAGAAAAGAGAATAGAAAAGAAGAGAAGAGAAAAGAGAAAAGAAAAAAGAAAAGAAA
DXS10135	28	28a	28''''''	3	1	24	0	0	0	0	0	0	0	0	0	1	1	1	1	1	AAGAAAGAAAGAGAAAGGAAAGAAAGAAAGAAAGAAAGAAAGAAAGAAAGAAAGAAAGAAAGAAAGAAAGAAAGAAAGAAAGAAAGAAAGAAAGAAAGAAAGAAAGAAAGAAAGAAAAGAGAATAGAAAAGAAGAGAAGAGAAAAGAGAAAAGAAAAAAGAAAAGAAA
DXS10135	28	28d	28'''''	3	1	20	0	0	0	0	3	1	0	0	0	1	1	1	1	1	AAGAAAGAAAGAGAAAGGAAAGAAAGAAAGAAAGAAAGAAAGAAAGAAAGAAAGAAAGAAAGAAAGAAAGAAAGAAAGAAAGAAAGAAAGAAAGAAAGAAAGGAAGGAAGGAAGAAAAGAGAATAGAAAAGAAGAGAAGAGAAAAGAGAAAAGAAAAAAGAAAAGAAA
DXS10135	28	28e	28''''	3	1	19	0	0	0	0	4	1	0	0	0	1	1	1	1	1	AAGAAAGAAAGAGAAAGGAAAGAAAGAAAGAAAGAAAGAAAGAAAGAAAGAAAGAAAGAAAGAAAGAAAGAAAGAAAGAAAGAAAGAAAGAAAGAAAGGAAGGAAGGAAGGAAGAAAAGAGAATAGAAAAGAAGAGAAGAGAAAAGAGAAAAGAAAAAAGAAAAGAAA
DXS10135	28	28f	28'''	3	1	18	0	0	0	0	1	3	0	1	1	1	1	1	1	1	AAGAAAGAAAGAGAAAGGAAAGAAAGAAAGAAAGAAAGAAAGAAAGAAAGAAAGAAAGAAAGAAAGAAAGAAAGAAAGAAAGAAAGAAAGAAAGGAAGAAAGAAAGAAAGGAAGAAAAGAGAATAGAAAAGAAGAGAAGAGAAAAGAGAAAAGAAAAAAGAAAAGAAA
DXS10135	28	28h	28	3	1	14	0	0	1	3	1	3	0	1	1	1	1	1	1	1	AAGAAAGAAAGAGAAAGGAAAGAAAGAAAGAAAGAAAGAAAGAAAGAAAGAAAGAAAGAAAGAAAGAAAGAAAGAAAGGAAGAAAGAAAGAAAGGAAGAAAGAAAGAAAGGAAGAAAAGAGAATAGAAAAGAAGAGAAGAGAAAAGAGAAAAGAAAAAAGAAAAGAAA
DXS10135	28	28n	28'	3	1	17	0	0	0	0	2	3	0	1	1	1	1	1	1	1	AAGAAAGAAAGAGAAAGGAAAGAAAGAAAGAAAGAAAGAAAGAAAGAAAGAAAGAAAGAAAGAAAGAAAGAAAGAAAGAAAGAAAGAAAGGAAGGAAGAAAGAAAGAAAGGAAGAAAAGAGAATAGAAAAGAAGAGAAGAGAAAAGAGAAAAGAAAAAAGAAAAGAAA
DXS10135	28	28m		3	1	17	0	0	1	1	0	3	0	1	1	1	1	1	1	1	AAGAAAGAAAGAGAAAGGAAAGAAAGAAAGAAAGAAAGAAAGAAAGAAAGAAAGAAAGAAAGAAAGAAAGAAAGAAAGAAAGAAAGAAAGGAAGAAAGAAAGAAAGAAAGGAAGAAAAGAGAATAGAAAAGAAGAGAAGAGAAAAGAGAAAAGAAAAAAGAAAAGAAA
DXS10135	28	28o	28''	3	1	18	0	0	0	0	2	2	0	1	1	1	1	1	1	1	AAGAAAGAAAGAGAAAGGAAAGAAAGAAAGAAAGAAAGAAAGAAAGAAAGAAAGAAAGAAAGAAAGAAAGAAAGAAAGAAAGAAAGAAAGGAAGGAAGAAAGAAAGAAAGGAAGAAAAGAGAATAGAAAAGAAGAGAAGAGAAAAGAGAAAAGAAAAAAGAAAAGAAA
DXS10135	28.1	28.1i	new	3	1	25	0	0	0	0	0	0	0	0	1	1	1	0	1	1	AAGAAAGAAAGAGAAAGGAAAGAAAGAAAGAAAGAAAGAAAGAAAGAAAGAAAGAAAGAAAGAAAGAAAGAAAGAAAGAAAGAAAGAAAGAAAGAAAGAAAGAAAGAAAGAAAGAAAGAAAAGAGAATAGAAAAGAGAAGAGAAAAGAGAAAAGAAAAAAGAAAAGAAA
DXS10135	29	29a	29''	3	1	25	0	0	0	0	0	0	0	0	0	1	1	1	1	1	AAGAAAGAAAGAGAAAGGAAAGAAAGAAAGAAAGAAAGAAAGAAAGAAAGAAAGAAAGAAAGAAAGAAAGAAAGAAAGAAAGAAAGAAAGAAAGAAAGAAAGAAAGAAAGAAAGAAAGAAAAGAGAATAGAAAAGAAGAGAAGAGAAAAGAGAAAAGAAAAAAGAAAAGAAA
DXS10135	29	29d	29''''	3	1	21	0	0	0	0	3	1	0	0	0	1	1	1	1	1	AAGAAAGAAAGAGAAAGGAAAGAAAGAAAGAAAGAAAGAAAGAAAGAAAGAAAGAAAGAAAGAAAGAAAGAAAGAAAGAAAGAAAGAAAGAAAGAAAGAAAGAAAGGAAGGAAGGAAGAAAAGAGAATAGAAAAGAAGAGAAGAGAAAAGAGAAAAGAAAAAAGAAAAGAAA
DXS10135	29	29e	new	3	1	20	0	0	0	0	4	1	0	0	0	1	1	1	1	1	AAGAAAGAAAGAGAAAGGAAAGAAAGAAAGAAAGAAAGAAAGAAAGAAAGAAAGAAAGAAAGAAAGAAAGAAAGAAAGAAAGAAAGAAAGAAAGAAAGAAAGGAAGGAAGGAAGGAAGAAAAGAGAATAGAAAAGAAGAGAAGAGAAAAGAGAAAAGAAAAAAGAAAAGAAA
DXS10135	29	29f	29'	3	1	19	0	0	0	0	1	3	0	1	1	1	1	1	1	1	AAGAAAGAAAGAGAAAGGAAAGAAAGAAAGAAAGAAAGAAAGAAAGAAAGAAAGAAAGAAAGAAAGAAAGAAAGAAAGAAAGAAAGAAAGAAAGAAAGGAAGAAAGAAAGAAAGGAAGAAAAGAGAATAGAAAAGAAGAGAAGAGAAAAGAGAAAAGAAAAAAGAAAAGAAA
DXS10135	29	29g	new	3	1	18	0	0	0	0	1	4	0	1	1	1	1	1	1	1	AAGAAAGAAAGAGAAAGGAAAGAAAGAAAGAAAGAAAGAAAGAAAGAAAGAAAGAAAGAAAGAAAGAAAGAAAGAAAGAAAGAAAGAAAGAAAGGAAGAAAGAAAGAAAGAAAGGAAGAAAAGAGAATAGAAAAGAAGAGAAGAGAAAAGAGAAAAGAAAAAAGAAAAGAAA
DXS10135	29	29h	29	3	1	15	0	0	1	3	1	3	0	1	1	1	1	1	1	1	AAGAAAGAAAGAGAAAGGAAAGAAAGAAAGAAAGAAAGAAAGAAAGAAAGAAAGAAAGAAAGAAAGAAAGAAAGAAAGAAAGGAAGAAAGAAAGAAAGGAAGAAAGAAAGAAAGGAAGAAAAGAGAATAGAAAAGAAGAGAAGAGAAAAGAGAAAAGAAAAAAGAAAAGAAA
DXS10135	29	29n	29'''	3	1	18	0	0	0	0	2	3	0	1	1	1	1	1	1	1	AAGAAAGAAAGAGAAAGGAAAGAAAGAAAGAAAGAAAGAAAGAAAGAAAGAAAGAAAGAAAGAAAGAAAGAAAGAAAGAAAGAAAGAAAGAAAGGAAGGAAGAAAGAAAGAAAGGAAGAAAAGAGAATAGAAAAGAAGAGAAGAGAAAAGAGAAAAGAAAAAAGAAAAGAAA
DXS10135	30	30a	30''	3	1	26	0	0	0	0	0	0	0	0	0	1	1	1	1	1	AAGAAAGAAAGAGAAAGGAAAGAAAGAAAGAAAGAAAGAAAGAAAGAAAGAAAGAAAGAAAGAAAGAAAGAAAGAAAGAAAGAAAGAAAGAAAGAAAGAAAGAAAGAAAGAAAGAAAGAAAGAAAAGAGAATAGAAAAGAAGAGAAGAGAAAAGAGAAAAGAAAAAAGAAAAGAAA
DXS10135	30	30b	30'''''	3	1	24	0	0	0	0	1	1	0	0	0	1	1	1	1	1	AAGAAAGAAAGAGAAAGGAAAGAAAGAAAGAAAGAAAGAAAGAAAGAAAGAAAGAAAGAAAGAAAGAAAGAAAGAAAGAAAGAAAGAAAGAAAGAAAGAAAGAAAGAAAGAAAGAAAGGAAGAAAAGAGAATAGAAAAGAAGAGAAGAGAAAAGAGAAAAGAAAAAAGAAAAGAAA
DXS10135	30	30d	30''''	3	1	22	0	0	0	0	3	1	0	0	0	1	1	1	1	1	AAGAAAGAAAGAGAAAGGAAAGAAAGAAAGAAAGAAAGAAAGAAAGAAAGAAAGAAAGAAAGAAAGAAAGAAAGAAAGAAAGAAAGAAAGAAAGAAAGAAAGAAAGAAAGGAAGGAAGGAAGAAAAGAGAATAGAAAAGAAGAGAAGAGAAAAGAGAAAAGAAAAAAGAAAAGAAA
DXS10135	30	30f	30'	3	1	20	0	0	0	0	1	3	0	1	1	1	1	1	1	1	AAGAAAGAAAGAGAAAGGAAAGAAAGAAAGAAAGAAAGAAAGAAAGAAAGAAAGAAAGAAAGAAAGAAAGAAAGAAAGAAAGAAAGAAAGAAAGAAAGAAAGGAAGAAAGAAAGAAAGGAAGAAAAGAGAATAGAAAAGAAGAGAAGAGAAAAGAGAAAAGAAAAAAGAAAAGAAA
DXS10135	30	30h	30	3	1	16	0	0	1	3	1	3	0	1	1	1	1	1	1	1	AAGAAAGAAAGAGAAAGGAAAGAAAGAAAGAAAGAAAGAAAGAAAGAAAGAAAGAAAGAAAGAAAGAAAGAAAGAAAGAAAGAAAGGAAGAAAGAAAGAAAGGAAGAAAGAAAGAAAGGAAGAAAAGAGAATAGAAAAGAAGAGAAGAGAAAAGAGAAAAGAAAAAAGAAAAGAAA
DXS10135	30	30n	30''''''	3	1	19	0	0	0	0	2	3	0	1	1	1	1	1	1	1	AAGAAAGAAAGAGAAAGGAAAGAAAGAAAGAAAGAAAGAAAGAAAGAAAGAAAGAAAGAAAGAAAGAAAGAAAGAAAGAAAGAAAGAAAGAAAGAAAGGAAGGAAGAAAGAAAGAAAGGAAGAAAAGAGAATAGAAAAGAAGAGAAGAGAAAAGAGAAAAGAAAAAAGAAAAGAAA
DXS10135	30	30p	30'''	3	1	20	0	0	0	0	5	1	0	0	0	1	1	1	1	1	AAGAAAGAAAGAGAAAGGAAAGAAAGAAAGAAAGAAAGAAAGAAAGAAAGAAAGAAAGAAAGAAAGAAAGAAAGAAAGAAAGAAAGAAAGAAAGAAAGAAAGGAAGGAAGGAAGGAAGGAAGAAAAGAGAATAGAAAAGAAGAGAAGAGAAAAGAGAAAAGAAAAAAGAAAAGAAA
DXS10135	30.1	30.1i	30.1	3	1	27	0	0	0	0	0	0	0	0	1	1	1	0	1	1	AAGAAAGAAAGAGAAAGGAAAGAAAGAAAGAAAGAAAGAAAGAAAGAAAGAAAGAAAGAAAGAAAGAAAGAAAGAAAGAAAGAAAGAAAGAAAGAAAGAAAGAAAGAAAGAAAGAAAGAAAGAAAGAAAAGAGAATAGAAAAGAGAAGAGAAAAGAGAAAAGAAAAAAGAAAAGAAA
DXS10135	30.1	30.1q	30.1'	3	1	17	1	0	7	0	1	1	0	0	0	1	1	1	1	1	AAGAAAGAAAGAGAAAGGAAAGAAAGAAAGAAAGAAAGAAAGAAAGAAAGAAAGAAAGAAAGAAAGAAAGAAAGAAAGAAAGAAAGAAAAGAAAGAAAGAAAGAAAGAAAGAAAGAAAGGAAGAAAAGAGAATAGAAAAGAAGAGAAGAGAAAAGAGAAAAGAAAAAAGAAAAGAAA
DXS10135	31	31a	31'	3	1	27	0	0	0	0	0	0	0	0	0	1	1	1	1	1	AAGAAAGAAAGAGAAAGGAAAGAAAGAAAGAAAGAAAGAAAGAAAGAAAGAAAGAAAGAAAGAAAGAAAGAAAGAAAGAAAGAAAGAAAGAAAGAAAGAAAGAAAGAAAGAAAGAAAGAAAGAAAGAAAAGAGAATAGAAAAGAAGAGAAGAGAAAAGAGAAAAGAAAAAAGAAAAGAAA
DXS10135	31	31f	31''	3	1	21	0	0	0	0	1	3	0	1	1	1	1	1	1	1	AAGAAAGAAAGAGAAAGGAAAGAAAGAAAGAAAGAAAGAAAGAAAGAAAGAAAGAAAGAAAGAAAGAAAGAAAGAAAGAAAGAAAGAAAGAAAGAAAGAAAGAAAGGAAGAAAGAAAGAAAGGAAGAAAAGAGAATAGAAAAGAAGAGAAGAGAAAAGAGAAAAGAAAAAAGAAAAGAAA
DXS10135	31	31g	new	3	1	20	0	0	0	0	1	4	0	1	1	1	1	1	1	1	AAGAAAGAAAGAGAAAGGAAAGAAAGAAAGAAAGAAAGAAAGAAAGAAAGAAAGAAAGAAAGAAAGAAAGAAAGAAAGAAAGAAAGAAAGAAAGAAAGAAAGGAAGAAAGAAAGAAAGAAAGGAAGAAAAGAGAATAGAAAAGAAGAGAAGAGAAAAGAGAAAAGAAAAAAGAAAAGAAA
DXS10135	31	31h	31	3	1	17	0	0	1	3	1	3	0	1	1	1	1	1	1	1	AAGAAAGAAAGAGAAAGGAAAGAAAGAAAGAAAGAAAGAAAGAAAGAAAGAAAGAAAGAAAGAAAGAAAGAAAGAAAGAAAGAAAGAAAGGAAGAAAGAAAGAAAGGAAGAAAGAAAGAAAGGAAGAAAAGAGAATAGAAAAGAAGAGAAGAGAAAAGAGAAAAGAAAAAAGAAAAGAAA
DXS10135	32	32f	32'	3	1	22	0	0	0	0	1	3	0	1	1	1	1	1	1	1	AAGAAAGAAAGAGAAAGGAAAGAAAGAAAGAAAGAAAGAAAGAAAGAAAGAAAGAAAGAAAGAAAGAAAGAAAGAAAGAAAGAAAGAAAGAAAGAAAGAAAGAAAGAAAGGAAGAAAGAAAGAAAGGAAGAAAAGAGAATAGAAAAGAAGAGAAGAGAAAAGAGAAAAGAAAAAAGAAAAGAAA
DXS10135	32	32g	new	3	1	21	0	0	0	0	1	4	0	1	1	1	1	1	1	1	AAGAAAGAAAGAGAAAGGAAAGAAAGAAAGAAAGAAAGAAAGAAAGAAAGAAAGAAAGAAAGAAAGAAAGAAAGAAAGAAAGAAAGAAAGAAAGAAAGAAAGAAAGGAAGAAAGAAAGAAAGAAAGGAAGAAAAGAGAATAGAAAAGAAGAGAAGAGAAAAGAGAAAAGAAAAAAGAAAAGAAA
DXS10135	32	32h	32	3	1	18	0	0	1	3	1	3	0	1	1	1	1	1	1	1	AAGAAAGAAAGAGAAAGGAAAGAAAGAAAGAAAGAAAGAAAGAAAGAAAGAAAGAAAGAAAGAAAGAAAGAAAGAAAGAAAGAAAGAAAGAAAGGAAGAAAGAAAGAAAGGAAGAAAGAAAGAAAGGAAGAAAAGAGAATAGAAAAGAAGAGAAGAGAAAAGAGAAAAGAAAAAAGAAAAGAAA
DXS10135	32.2	32.2s	32.2	3	1	15	0	0	0	0	0	0	1	0	13	1	1	1	1	1	AAGAAAGAAAGAGAAAGGAAAGAAAGAAAGAAAGAAAGAAAGAAAGAAAGAAAGAAAGAAAGAAAGAAAGAAAGAAAGAGAAAGAAAGAAAGAAAGAAAGAAAGAAAGAAAGAAAGAAAGAAAGAAAGAAAGAAAAGAGAATAGAAAAGAAGAGAAGAGAAAAGAGAAAAGAAAAAAGAAAAGAAA
DXS10135	33	33f	33'	3	1	23	0	0	0	0	1	3	0	1	1	1	1	1	1	1	AAGAAAGAAAGAGAAAGGAAAGAAAGAAAGAAAGAAAGAAAGAAAGAAAGAAAGAAAGAAAGAAAGAAAGAAAGAAAGAAAGAAAGAAAGAAAGAAAGAAAGAAAGAAAGAAAGGAAGAAAGAAAGAAAGGAAGAAAAGAGAATAGAAAAGAAGAGAAGAGAAAAGAGAAAAGAAAAAAGAAAAGAAA
DXS10135	33	33g	new	3	1	22	0	0	0	0	1	4	0	1	1	1	1	1	1	1	AAGAAAGAAAGAGAAAGGAAAGAAAGAAAGAAAGAAAGAAAGAAAGAAAGAAAGAAAGAAAGAAAGAAAGAAAGAAAGAAAGAAAGAAAGAAAGAAAGAAAGAAAGAAAGGAAGAAAGAAAGAAAGAAAGGAAGAAAAGAGAATAGAAAAGAAGAGAAGAGAAAAGAGAAAAGAAAAAAGAAAAGAAA
DXS10135	33	33h	33	3	1	19	0	0	1	3	1	3	0	1	1	1	1	1	1	1	AAGAAAGAAAGAGAAAGGAAAGAAAGAAAGAAAGAAAGAAAGAAAGAAAGAAAGAAAGAAAGAAAGAAAGAAAGAAAGAAAGAAAGAAAGAAAGAAAGGAAGAAAGAAAGAAAGGAAGAAAGAAAGAAAGGAAGAAAAGAGAATAGAAAAGAAGAGAAGAGAAAAGAGAAAAGAAAAAAGAAAAGAAA
DXS10135	33	33n	33''	3	1	22	0	0	0	0	2	3	0	1	1	1	1	1	1	1	AAGAAAGAAAGAGAAAGGAAAGAAAGAAAGAAAGAAAGAAAGAAAGAAAGAAAGAAAGAAAGAAAGAAAGAAAGAAAGAAAGAAAGAAAGAAAGAAAGAAAGAAAGAAAGGAAGGAAGAAAGAAAGAAAGGAAGAAAAGAGAATAGAAAAGAAGAGAAGAGAAAAGAGAAAAGAAAAAAGAAAAGAAA
DXS10135	33	33m		3	1	13	0	0	15	1	0	0		0	0	1	1	1	1	1	AAGAAAGAAAGAGAAAGGAAAGAAAGAAAGAAAGAAAGAAAGAAAGAAAGAAAGAAAGAAAGAAAGAAAGAAAGGAAGGAAGGAAGGAAGGAAGGAAGGAAGGAAGGAAGGAAGGAAGGAAGGAAGGAAGGAAGAAAAGAGAATAGAAAAGAAGAGAAGAGAAAAGAGAAAAGAAAAAAGAAAAGAAA
DXS10135	33.2	33.2s	33.2	3	1	16	0	0	0	0	0	0	1	0	13	1	1	1	1	1	AAGAAAGAAAGAGAAAGGAAAGAAAGAAAGAAAGAAAGAAAGAAAGAAAGAAAGAAAGAAAGAAAGAAAGAAAGAAAGAAAGAGAAAGAAAGAAAGAAAGAAAGAAAGAAAGAAAGAAAGAAAGAAAGAAAGAAAGAAAAGAGAATAGAAAAGAAGAGAAGAGAAAAGAGAAAAGAAAAAAGAAAAGAAA
DXS10135	34	34f	34'	3	1	24	0	0	0	0	1	3	0	1	1	1	1	1	1	1	AAGAAAGAAAGAGAAAGGAAAGAAAGAAAGAAAGAAAGAAAGAAAGAAAGAAAGAAAGAAAGAAAGAAAGAAAGAAAGAAAGAAAGAAAGAAAGAAAGAAAGAAAGAAAGAAAGAAAGGAAGAAAGAAAGAAAGGAAGAAAAGAGAATAGAAAAGAAGAGAAGAGAAAAGAGAAAAGAAAAAAGAAAAGAAA
DXS10135	34	34n	34	3	1	23	0	0	0	0	2	3	0	1	1	1	1	1	1	1	AAGAAAGAAAGAGAAAGGAAAGAAAGAAAGAAAGAAAGAAAGAAAGAAAGAAAGAAAGAAAGAAAGAAAGAAAGAAAGAAAGAAAGAAAGAAAGAAAGAAAGAAAGAAAGAAAGGAAGGAAGAAAGAAAGAAAGGAAGAAAAGAGAATAGAAAAGAAGAGAAGAGAAAAGAGAAAAGAAAAAAGAAAAGAAA
DXS10135	34	34a		3	1	20	0	0	1	3	1	3	0	1	1	1	1	1	1	1	AAGAAAGAAAGAGAAAGGAAAGAAAGAAAGAAAGAAAGAAAGAAAGAAAGAAAGAAAGAAAGAAAGAAAGAAAGAAAGAAAGAAAGAAAGAAAGAAAGAAAGGAAGAAAGAAAGAAAGGAAGAAAGAAAGAAAGGAAGAAAAGAGAATAGAAAAGAAGAGAAGAGAAAAGAGAAAAGAAAAAAGAAAAGAAA
DXS10135	34.1	34.1q	34.1	3	1	21	1	0	7	0	1	1	0	0	0	1	1	1	1	1	AAGAAAGAAAGAGAAAGGAAAGAAAGAAAGAAAGAAAGAAAGAAAGAAAGAAAGAAAGAAAGAAAGAAAGAAAGAAAGAAAGAAAGAAAGAAAGAAAGAAAGAAAAGAAAGAAAGAAAGAAAGAAAGAAAGAAAGGAAGAAAAGAGAATAGAAAAGAAGAGAAGAGAAAAGAGAAAAGAAAAAAGAAAAGAAA
DXS10135	34.2	34.2b		3	1	16	0	0	0	0	0	0	1	0	14	1	1	1	1	1	AAGAAAGAAAGAGAAAGGAAAGAAAGAAAGAAAGAAAGAAAGAAAGAAAGAAAGAAAGAAAGAAAGAAAGAAAGAAAGAAAGAGAAAGAAAGAAAGAAAGAAAGAAAGAAAGAAAGAAAGAAAGAAAGAAAGAAAGAAAGAAAAGAGAATAGAAAAGAAGAGAAGAGAAAAGAGAAAAGAAAAAAGAAAAGAAA
DXS10135	35	35f	35'	3	1	25	0	0	0	0	1	3	0	1	1	1	1	1	1	1	AAGAAAGAAAGAGAAAGGAAAGAAAGAAAGAAAGAAAGAAAGAAAGAAAGAAAGAAAGAAAGAAAGAAAGAAAGAAAGAAAGAAAGAAAGAAAGAAAGAAAGAAAGAAAGAAAGAAAGAAAGGAAGAAAGAAAGAAAGGAAGAAAAGAGAATAGAAAAGAAGAGAAGAGAAAAGAGAAAAGAAAAAAGAAAAGAAA
DXS10135	35	35v	35	3	1	16	0	0	0	0	14	1	0	0	0	1	1	1	1	1	AAGAAAGAAAGAGAAAGGAAAGAAAGAAAGAAAGAAAGAAAGAAAGAAAGAAAGAAAGAAAGAAAGAAAGAAAGAAAGAAAGAAAGGAAGGAAGGAAGGAAGGAAGGAAGGAAGGAAGGAAGGAAGGAAGGAAGGAAGGAAGAAAAGAGAATAGAAAAGAAGAGAAGAGAAAAGAGAAAAGAAAAAAGAAAAGAAA
DXS10135	35.2	35.2u	35.2	3	1	16	0	0	0	0	0	0	1	0	15	1	1	1	1	1	AAGAAAGAAAGAGAAAGGAAAGAAAGAAAGAAAGAAAGAAAGAAAGAAAGAAAGAAAGAAAGAAAGAAAGAAAGAAAGAAAGAGAAAGAAAGAAAGAAAGAAAGAAAGAAAGAAAGAAAGAAAGAAAGAAAGAAAGAAAGAAAGAAAAGAGAATAGAAAAGAAGAGAAGAGAAAAGAGAAAAGAAAAAAGAAAAGAAA
DXS10135	36	36f	36	3	1	26	0	0	0	0	1	3	0	1	1	1	1	1	1	1	AAGAAAGAAAGAGAAAGGAAAGAAAGAAAGAAAGAAAGAAAGAAAGAAAGAAAGAAAGAAAGAAAGAAAGAAAGAAAGAAAGAAAGAAAGAAAGAAAGAAAGAAAGAAAGAAAGAAAGAAAGAAAGGAAGAAAGAAAGAAAGGAAGAAAAGAGAATAGAAAAGAAGAGAAGAGAAAAGAGAAAAGAAAAAAGAAAAGAAA
DXS10135	36	36w	36'	3	1	15	0	0	0	0	16	1	0	0	0	1	1	1	1	1	AAGAAAGAAAGAGAAAGGAAAGAAAGAAAGAAAGAAAGAAAGAAAGAAAGAAAGAAAGAAAGAAAGAAAGAAAGAAAGAAAGGAAGGAAGGAAGGAAGGAAGGAAGGAAGGAAGGAAGGAAGGAAGGAAGGAAGGAAGGAAGGAAGAAAAGAGAATAGAAAAGAAGAGAAGAGAAAAGAGAAAAGAAAAAAGAAAAGAAA
DXS10135	36.2	36.2s	36.2	3	1	19	0	0	0	0	0	0	1	0	13	1	1	1	1	1	AAGAAAGAAAGAGAAAGGAAAGAAAGAAAGAAAGAAAGAAAGAAAGAAAGAAAGAAAGAAAGAAAGAAAGAAAGAAAGAAAGAAAGAAAGAAAGAGAAAGAAAGAAAGAAAGAAAGAAAGAAAGAAAGAAAGAAAGAAAGAAAGAAAGAAAAGAGAATAGAAAAGAAGAGAAGAGAAAAGAGAAAAGAAAAAAGAAAAGAAA
DXS10135	36.2	36.2t	36.2'	3	1	18	0	0	0	0	0	0	1	0	14	1	1	1	1	1	AAGAAAGAAAGAGAAAGGAAAGAAAGAAAGAAAGAAAGAAAGAAAGAAAGAAAGAAAGAAAGAAAGAAAGAAAGAAAGAAAGAAAGAAAGAGAAAGAAAGAAAGAAAGAAAGAAAGAAAGAAAGAAAGAAAGAAAGAAAGAAAGAAAGAAAAGAGAATAGAAAAGAAGAGAAGAGAAAAGAGAAAAGAAAAAAGAAAAGAAA
DXS10135	37.2	37.2r	37.2	3	1	21	0	0	0	0	0	0	1	0	12	1	1	1	1	1	AAGAAAGAAAGAGAAAGGAAAGAAAGAAAGAAAGAAAGAAAGAAAGAAAGAAAGAAAGAAAGAAAGAAAGAAAGAAAGAAAGAAAGAAAGAAAGAAAGAAAGAGAAAGAAAGAAAGAAAGAAAGAAAGAAAGAAAGAAAGAAAGAAAGAAAGAAAAGAGAATAGAAAAGAAGAGAAGAGAAAAGAGAAAAGAAAAAAGAAAAGAAA
DXS10135	38	38n	38	3	1	27	0	0	0	0	2	3	0	1	1	1	1	1	1	1	AAGAAAGAAAGAGAAAGGAAAGAAAGAAAGAAAGAAAGAAAGAAAGAAAGAAAGAAAGAAAGAAAGAAAGAAAGAAAGAAAGAAAGAAAGAAAGAAAGAAAGAAAGAAAGAAAGAAAGAAAGAAAGAAAGGAAGGAAGAAAGAAAGAAAGGAAGAAAAGAGAATAGAAAAGAAGAGAAGAGAAAAGAGAAAAGAAAAAAGAAAAGAAA
Locus	Allele	code	Novroski	TAGA	TGA	TAGA	GA	CAGA	TAGA	sequence
DXS7132	11	11a	11	0	0	11	0	0	0	TAGATAGATAGATAGATAGATAGATAGATAGATAGATAGATAGA
DXS7132	12	12a	12, 12'	0	0	12	0	0	0	TAGATAGATAGATAGATAGATAGATAGATAGATAGATAGATAGATAGA
DXS7132	13	13a	13, 13'	0	0	13	0	0	0	TAGATAGATAGATAGATAGATAGATAGATAGATAGATAGATAGATAGATAGA
DXS7132	14	14a	14, 14'	0	0	14	0	0	0	TAGATAGATAGATAGATAGATAGATAGATAGATAGATAGATAGATAGATAGATAGA
DXS7132	14.2	14.2b	14.2	0	0	13	1	0	1	TAGATAGATAGATAGATAGATAGATAGATAGATAGATAGATAGATAGATAGAGATAGA
DXS7132	15	15a	15, 15'	0	0	15	0	0	0	TAGATAGATAGATAGATAGATAGATAGATAGATAGATAGATAGATAGATAGATAGATAGA
DXS7132	15	15c	15''	0	0	14	0	1	0	TAGATAGATAGATAGATAGATAGATAGATAGATAGATAGATAGATAGATAGATAGACAGA
DXS7132	15.3	15.3d	15.3	2	1	13	0	0	0	TAGATAGATGATAGATAGATAGATAGATAGATAGATAGATAGATAGATAGATAGATAGATAGA
DXS7132	16	16a	16, 16'	0	0	16	0	0	0	TAGATAGATAGATAGATAGATAGATAGATAGATAGATAGATAGATAGATAGATAGATAGATAGA
DXS7132	16	16e	16''	0	0	6	0	1	9	TAGATAGATAGATAGATAGATAGACAGATAGATAGATAGATAGATAGATAGATAGATAGATAGA
DXS7132	17	17a	17	0	0	17	0	0	0	TAGATAGATAGATAGATAGATAGATAGATAGATAGATAGATAGATAGATAGATAGATAGATAGATAGA
DXS7132	18	18a		0	0	18	0	0	0	TAGATAGATAGATAGATAGATAGATAGATAGATAGATAGATAGATAGATAGATAGATAGATAGATAGATAGA
Locus	Allele	code	Novroski	TCCA	TCTG	TCCT	TCCA	TTCA	TCCA	sequence
DXS7423	8	8b	8	0	0	0	0	0	10	TCCATCCATCCATCCATCCATCCATCCATCCATCCATCCA
DXS7423	12	12a	12	3	1	1	0	0	9	TCCATCCATCCATCTGTCCTTCCATCCATCCATCCATCCATCCATCCATCCATCCA
DXS7423	13	13a	13	3	1	1	0	0	10	TCCATCCATCCATCTGTCCTTCCATCCATCCATCCATCCATCCATCCATCCATCCATCCA
DXS7423	14	14a	14	3	1	1	0	0	11	TCCATCCATCCATCTGTCCTTCCATCCATCCATCCATCCATCCATCCATCCATCCATCCATCCA
DXS7423	15	15a	15'	3	1	1	0	0	12	TCCATCCATCCATCTGTCCTTCCATCCATCCATCCATCCATCCATCCATCCATCCATCCATCCATCCA
DXS7423	15	15c	15	3	1	1	2	1	9	TCCATCCATCCATCTGTCCTTCCATCCATTCATCCATCCATCCATCCATCCATCCATCCATCCATCCA
DXS7423	16	16a	16	3	1	1	0	0	13	TCCATCCATCCATCTGTCCTTCCATCCATCCATCCATCCATCCATCCATCCATCCATCCATCCATCCATCCA
DXS7423	17	17a	17	3	1	1	0	0	14	TCCATCCATCCATCTGTCCTTCCATCCATCCATCCATCCATCCATCCATCCATCCATCCATCCATCCATCCATCCA
DXS7423	18	18a	18	3	1	1	0	0	15	TCCATCCATCCATCTGTCCTTCCATCCATCCATCCATCCATCCATCCATCCATCCATCCATCCATCCATCCATCCATCCA
Locus	Allele	code	Novroski	CTAT	CTGT	CTAT	sequence
DXS8378	8	8a	8	0	0	8	CTATCTATCTATCTATCTATCTATCTATCTAT
DXS8378	9	9a	9, 9'	0	0	9	CTATCTATCTATCTATCTATCTATCTATCTATCTAT
DXS8378	10	10a	10', 10'', 10'''	0	0	10	CTATCTATCTATCTATCTATCTATCTATCTATCTATCTAT
DXS8378	10	10c	10	6	1	3	CTATCTATCTATCTATCTATCTATCTGTCTATCTATCTAT
DXS8378	11	11a	11	0	0	11	CTATCTATCTATCTATCTATCTATCTATCTATCTATCTATCTAT
DXS8378	12	12a	12, 12'	0	0	12	CTATCTATCTATCTATCTATCTATCTATCTATCTATCTATCTATCTAT
DXS8378	12	12b	12''	1	1	10	CTATCTGTCTATCTATCTATCTATCTATCTATCTATCTATCTATCTAT
DXS8378	13	13a	13	0	0	13	CTATCTATCTATCTATCTATCTATCTATCTATCTATCTATCTATCTATCTAT
DXS8378	14	14a	14	0	0	14	CTATCTATCTATCTATCTATCTATCTATCTATCTATCTATCTATCTATCTATCTAT
Locus	Allele	code	Novroski	AGAT	ATGG	AGAT	sequence
HPRB	8	8a	new	8	0	0	AGATAGATAGATAGATAGATAGATAGATAGAT
HPRB	9	9a	9	9	0	0	AGATAGATAGATAGATAGATAGATAGATAGATAGAT
HPRB	10	10a	10	10	0	0	AGATAGATAGATAGATAGATAGATAGATAGATAGATAGAT
HPRB	11	11a	11	11	0	0	AGATAGATAGATAGATAGATAGATAGATAGATAGATAGATAGAT
HPRB	12	12a	10.2, 11.3,12', 12''	12	0	0	AGATAGATAGATAGATAGATAGATAGATAGATAGATAGATAGATAGAT
HPRB	13	13a	12	13	0	0	AGATAGATAGATAGATAGATAGATAGATAGATAGATAGATAGATAGATAGAT
HPRB	13	13b	13', 13''	11	1	1	AGATAGATAGATAGATAGATAGATAGATAGATAGATAGATAGATATGGAGAT
HPRB	14	14a	13	14	0	0	AGATAGATAGATAGATAGATAGATAGATAGATAGATAGATAGATAGATAGATAGAT
HPRB	14	14b	14	12	1	1	AGATAGATAGATAGATAGATAGATAGATAGATAGATAGATAGATAGATATGGAGAT
HPRB	15	15a	15	15	0	0	AGATAGATAGATAGATAGATAGATAGATAGATAGATAGATAGATAGATAGATAGATAGAT
HPRB	16	16a	16	16	0	0	AGATAGATAGATAGATAGATAGATAGATAGATAGATAGATAGATAGATAGATAGATAGATAGAT
* In red non-previoulsy reported alleles based on sequence found in the Mexican population sample
